# Supplementary material
Source: PubMed Central journal article supplement (PMC3295193)
Supplement: supp_32.5.992_MCB6665-11_supp_mat.pdf [file supp_32.5.992_MCB6665-11_supp_mat.pdf]

**Majumder Supplemental Table I**  
**Primers used for RT-PCR**

| <b>RNA</b> | <b>Primers</b>                                                                                          | <b>Notes</b>                                          |
|------------|---------------------------------------------------------------------------------------------------------|-------------------------------------------------------|
| 18S rRNA   | Forward 5'-TTGACGGAAGGGCACCACCAG-3'<br>Reverse 5'-GCACCACCACCCACGGAATCG-3'                              | RT-qPCR                                               |
| ATF4       | Forward 5'-GTTTGACTTCGATGCTCTGTTTC-3'<br>Reverse 5'-GGGCTCCTTATTAGTCTCTTGG-3'                           | RT-qPCR                                               |
| CHOP       | Forward: 5'- CTGGAAGCCTGGTATGAGGAT-3'<br>Reverse: 5'- CAGGGTCAAGAGTAGTGAAGGT-3'                         | RT-qPCR                                               |
| DNAJB2     | Forward: 5'- GCTTCACATTCACCTTCCGTA-3'<br>Reverse: 5'- CGAGAAGACACCCAAGTCATC-3'                          | RT-qPCR                                               |
| XBP1s      | Forward: 5'-GAGTCCGCAGCAGGTG-3'<br>Reverse: 5'-GTGTCAGAGTCCATGGGA-3'                                    | RT-qPCR<br>The forward primer spans the splice site   |
| XBP1u      | Forward: 5'-GACTATGTGCACCTCTGCAG-3'<br>Reverse: 5'-CTGGGAGTTCCTCCAGACTA-3'                              | RT-qPCR<br>The forward primer lies within the intron  |
| XBP1       | Forward: 5'-ACACGCTTGGGAATGGACAC-3'<br>Reverse: 5'-CCATGGGAAGATGTTCTGGG-3'                              | for agarose gel analysis                              |
| XBP1       | Forward: 5'- GGCTGTCTGGCCTTAGAAGA -3'<br>Reverse: 5'- CTGTCAAATGACCCTCCCTG -3'                          | 3'-UTR primers for analysis of total XBP1 by RT-qPCR  |
| XBP1       | Forward:<br>5'-GAATCTTTGTAAAATGATGAAAATTTACTATG-3'<br>Reverse:<br>5'-TCTGTGTTGCTTTTTTTTTTAATTGCAAGGG-3' | Poly(A) tail length assay                             |
| XBP1       | 5'- CCTCTAGACTCGAGCGGCCGC-3'                                                                            | RT primer for detection of transfected XBP1 (Fig. 3B) |

**Supplemental Table 2**  
**The turnover of XBP1u mRNA is not affected by the UPR in S/S and A/A cells**

|                  | <b>Control</b>           | <b>Tg (3 h)</b> |
|------------------|--------------------------|-----------------|
|                  | XBP1u mRNA half-life (h) |                 |
| <b>S/S Cells</b> | 1.2 ± 0.1                | 1.1 ± 0.1       |
| <b>A/A Cells</b> | 1.3 ± 0.3                | 1.2 ± 0.3       |

S/S and A/A cells were cultured for 3 h with or without Tg and the half-life of XBP1u mRNA was determined by RT-qPCR as described in Fig. 1.

## Legends for Supplemental Figures

### Supplemental Fig 1:

Validation of primers specific for XBP1u, XBP1s, and total XBP1 mRNAs. A. cDNAs encoding XBP1u and XBP1s were amplified using the indicated primers and analyzed by agarose gel electrophoresis. B. IRE<sup>-/-</sup> and S/S cells were incubated for 3 h with or without Tg as indicated and mRNAs were analyzed by RT-PCR using the indicated primers.

### Supplemental Fig. 2

ATF4 and CHOP mRNAs are stabilized during the UPR in a process that does not require decreased translational efficiency. S/S cells were incubated with or without Tg for 3 h. (*Left*) The half-lives of the ATF4 and CHOP mRNAs were determined as in Fig. 1. (*Right*) The distribution of the ATF4 and CHOP mRNAs on polyribosome profiles was analyzed and used to calculate the percentage of the total signal in the polyribosome fraction. \*Value from Tg-treated cells is significantly different from the control value ( $p < 0.05$ ).

## Majumder Supplemental Figure 1



## Majumder Supplemental Figure 2
